# Supplementary material for: A lincRNA-p21/miR-181 family feedback loop regulates microglial activation during systemic LPS- and MPTP- induced neuroinflammation
Source: PubMed Central journal article supplement (PMC6056543; doi:10.1038/s41419-018-0821-5), 2018-07-23

**Fig. 1c**

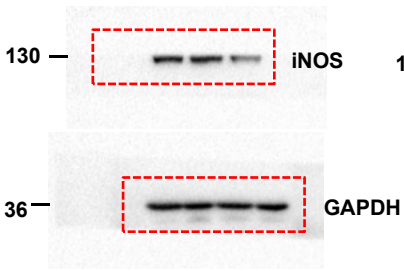

**Fig. 1f**

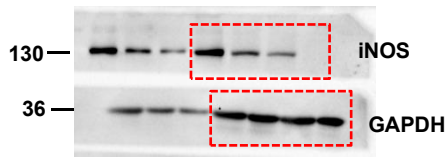

**Fig. 2a**

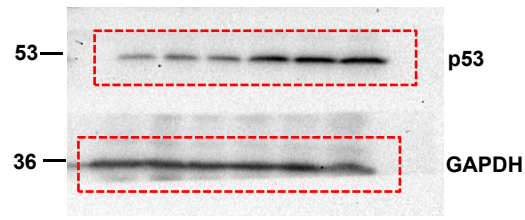

**Fig. 2b**

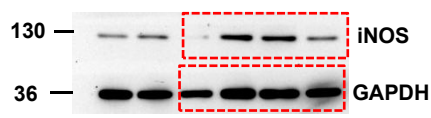

**Fig. 2e**

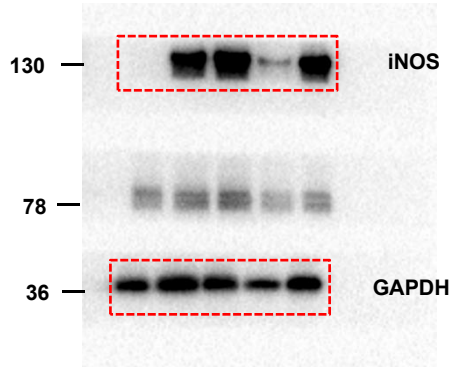

**Fig. 3h**

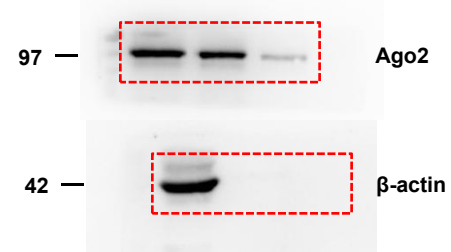

**Fig. 4b**

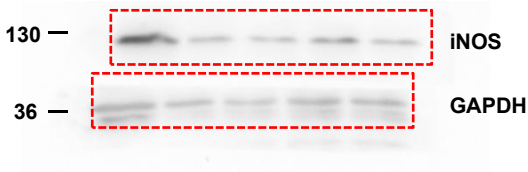

**Fig. 4f**

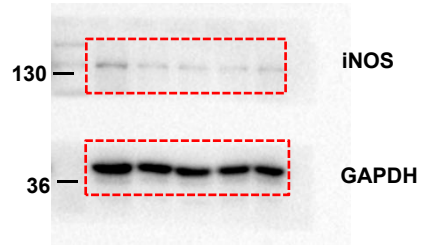

**Fig. 5c**

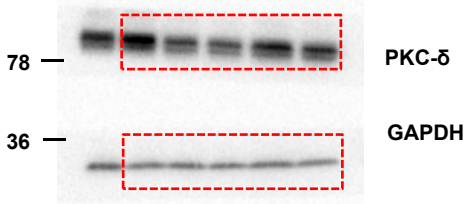

**Fig. 5d**

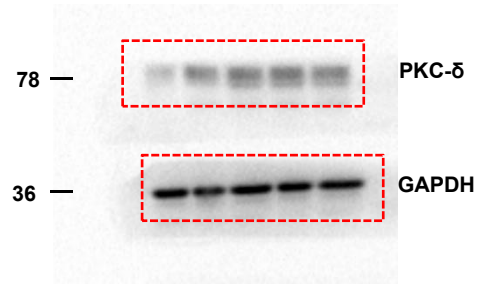

**Fig. 5e**

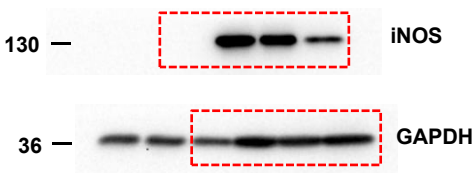

**Fig. 6a**

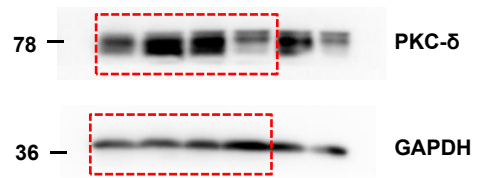

**Fig. 6b**

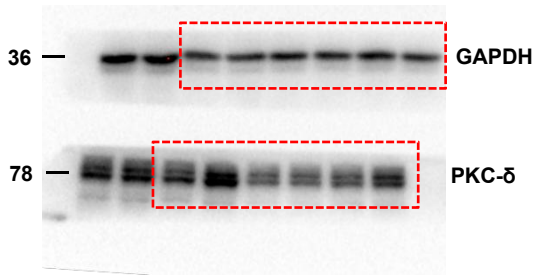

**Fig. 6d**

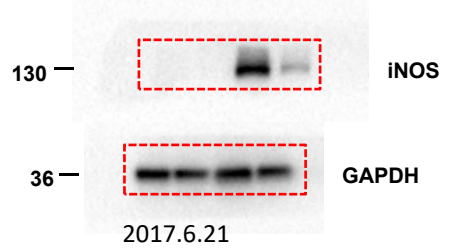

**Fig. 6g**

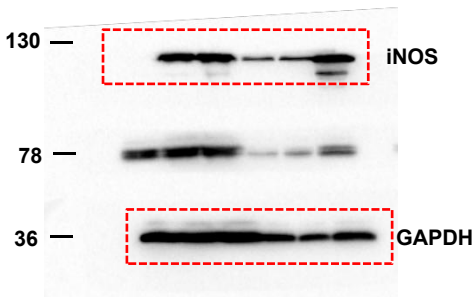

**Fig. 6h**

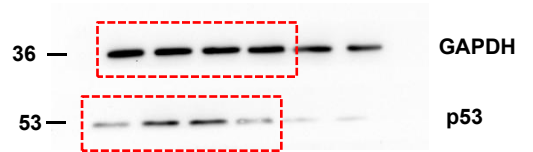

**Fig. 6j**

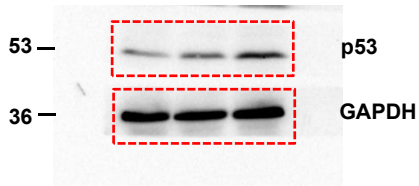

**Fig. 6l**

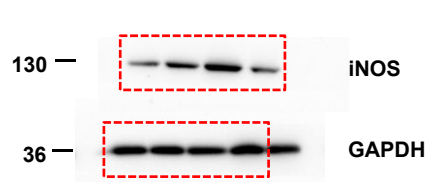

**Fig. 6m**

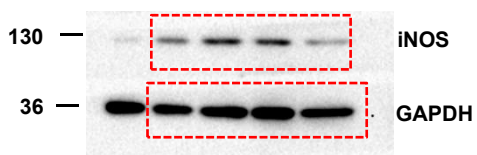

**Fig. 7i**

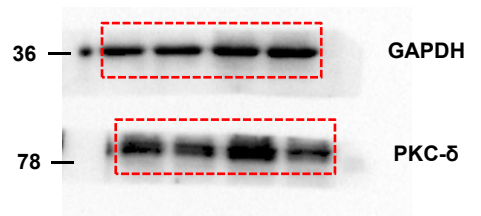

**Fig. 7j**

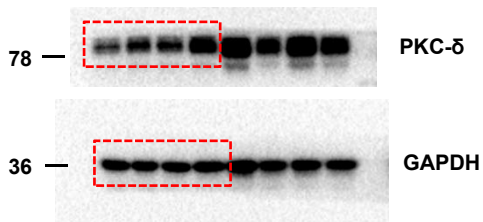

Supplement: 41419_2018_821_MOESM10_ESM.pdf [file 41419_2018_821_MOESM10_ESM.pdf]
