# Supplementary material for: A lincRNA-p21/miR-181 family feedback loop regulates microglial activation during systemic LPS- and MPTP- induced neuroinflammation
Source: PubMed Central journal article supplement (PMC6056543; doi:10.1038/s41419-018-0821-5), 2018-07-23

**a**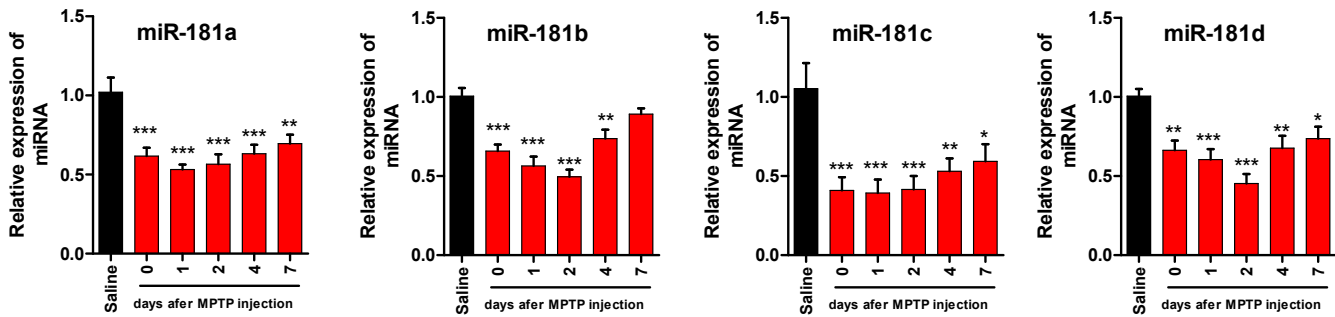**b**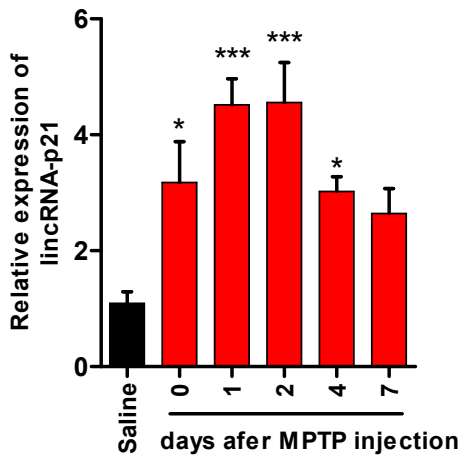**c**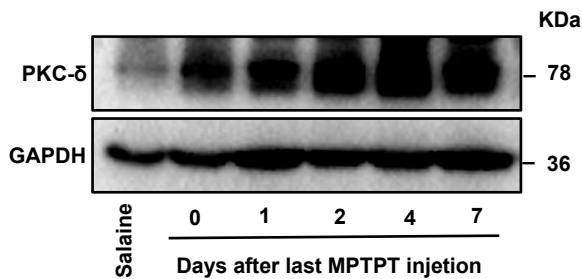**d**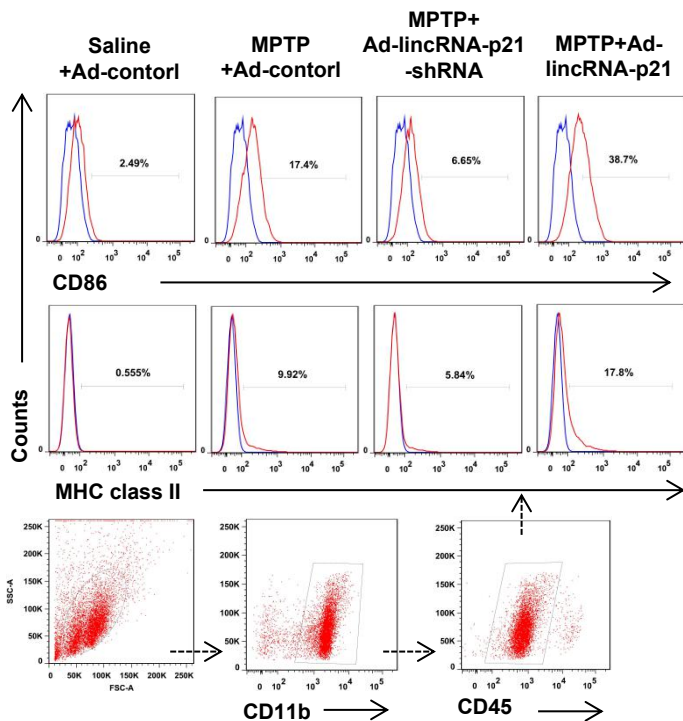**e**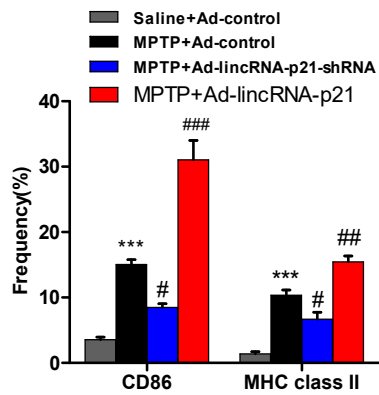

Supplement: 41419_2018_821_MOESM9_ESM.pdf [file 41419_2018_821_MOESM9_ESM.pdf]
