# Supplementary material for: A lincRNA-p21/miR-181 family feedback loop regulates microglial activation during systemic LPS- and MPTP- induced neuroinflammation
Source: PubMed Central journal article supplement (PMC6056543; doi:10.1038/s41419-018-0821-5), 2018-07-23
Supplement: 41419_2018_821_MOESM11_ESM.pdf [file 41419_2018_821_MOESM11_ESM.pdf]

**Supplementary Table 1**

| Gene           |           | Primer sequences                                       |
|----------------|-----------|--------------------------------------------------------|
| lincRNA-p21    | Forward   | GAAAGCGAGTGGGACAGG                                     |
|                | Reverse   | CAGGGCAAGAACTTGTGGAC                                   |
| PRKCD          | Forward   | CCAAGGTGCTGATGTGTGTG                                   |
|                | Reverse   | AAGGTGGCGATAAACTCGTG                                   |
| iNOS           | Forward   | GCTTGGGTCTTGTTCACTCC                                   |
|                | Reverse   | TCCTCTTTCAGGTCACCTTGG                                  |
| IL-6           | Forward   | TTCCATCCAGTTGCCTTCTT                                   |
|                | Reverse   | CATTTCCACGATTTCCCAGA                                   |
| TNF- $\alpha$  | Forward   | TATGGCTCAGGGTCCAACTC                                   |
|                | Reverse   | GGAAAGCCCATTTGAGTCCT                                   |
| IL-1 $\beta$   | Forward   | TGTGCAAGTGTCTGAAGCAGC                                  |
|                | Reverse   | TGGAAGCAGCCCTTCATCTT                                   |
| MCP-1          | Forward   | CTGAAGCCAGCTCTCTTCCCT                                  |
|                | Reverse   | GAGCCAACACGTGGATGCT                                    |
| Iba1           | Forward   | CTTGAAGCGAATGCTGGAGAA                                  |
|                | Reverse   | GGAGCCACTGGACACCTCTCT                                  |
| 18S rRNA       | Forward   | CGGCTACCACATCCAAGGAA                                   |
|                | Reverse   | GCTGGAATTACCGCGGCT                                     |
| $\beta$ -actin | Forward   | CTAAGGCCAACCGTGAAAAG                                   |
|                | Reverse   | ACCAGAGGCATACAGGGACA                                   |
| U2 snRNA       | Forward   | GGCCTTTTGGCTAAGATCAAGT                                 |
|                | Reverse   | GCAAGCTCCTATTCCAACCTCC                                 |
| miR-181a       | Forward   | GCGGCGGAACATTCAACGCTGTC                                |
|                | RT primer | GTCGTATCCAGTGCAGGGTCCGAGGTA<br>TTCGCACTGGATACGACACTCAC |
| miR-181b       | Forward   | TGG CGG AAC ATT CAT TGC TGT CG                         |
|                | RT primer | GTCGTATCCAGTGCAGGGTCCGAGGTA<br>TTCGCACTGGATACGACACCCAC |
| miR-181c       | Forward   | TTG GCG GAA CAT TCA ACC TGT CG                         |
|                | RT primer | GTCGTATCCAGTGCAGGGTCCGAGGTA<br>TTCGCACTGGATACGACACTCAC |
| miR-181d       | Forward   | CGG CGG AAC ATT CAT TGT TGT CG                         |
|                | RT primer | GTCGTATCCAGTGCAGGGTCCGAGGTA<br>TTCGCACTGGATACGACACCCAC |
| miRNA          | Reverse   | ATCCAGTGCAGGGTCCGAGG                                   |
